# Supplementary material
Source: publisher site journal article supplement (https://www.dovepress.com/get_supplementary_file.php?f=242075.docx)
Supplement: Supplementary file 1 [file get_supplementary_file.php]

**Supplementary material:**

Table of all hypercapnic patients at hospital admission - including patients initials, age, blood gas values (pCO2, pO2, pH, SO2, BE, and HCO3-), diagnoses (cause of hypercapnia), and outcome.

death in hospital: died in hospital; death 1 year: died within the first year after hospital admission; alive: alive after 1 year; AE COPD: acute exacerbated COPD; cardiac: decompensated heart failure; ob/hypovent: obesitas/hypoventilation syndrome: miscellaneneous: miscellaneous including neuromuscular: neuromuscular diseases; intox. (opiat): intoxications.

| ***Pat*** | ***m/w*** | ***age*** | ***PCO2*** | ***PO2*** | ***pH*** | ***SO2*** | ***BE*** | ***HCO3-*** | ***Diagnoses*** | ***Outcome*** |
| --- | --- | --- | --- | --- | --- | --- | --- | --- | --- | --- |
| H.J. | m | 84 | 135,4 | 31,2 | 7.065 | 36,1 | 4,6 | 37,9 | Pneumonia | death in hospital |
| W.R. | m | 83 | 85,3 | 146,1 | 7.257 | 98,8 | 6,0 | 37,1 | Pneumonia | death in hospital |
| K.K. | m | 81 | 63,7 | 60,6 | 7.447 | 93,0 | 15,4 | 43,0 | Pneumonia | death in hospital |
| R.W. | m | 83 | 59,7 | 68,4 | 7.405 | 94,0 | 10,3 | 36,6 | Pneumonia | death in hospital |
| B.O. | w | 87 | 58,0 | 38,2 | 7.389 | 72,9 | 7,4 | 34,2 | Pneumonia | death in hospital |
| I.M. | w | 82 | 57,9 | 46,8 | 7.372 | 81,9 | 5,7 | 32,8 | Pneumonia | death in hospital |
| R.G. | m | 61 | 53,7 | 47,8 | 7.298 | 78,1 | -1,4 | 25,7 | Pneumonia | death in hospital |
| G.K. | w | 72 | 52,6 | 32,8 | 7.253 | 51,1 | -4,6 | 22,7 | Pneumonia | death in hospital |
| A.G. | m | 83 | 52,2 | 56,6 | 7.397 | 89,4 | 5,4 | 31,1 | Pneumonia | death in hospital |
| K.S. | m | 79 | 51,2 | 71,3 | 7.251 | 90,4 | -5,4 | 22,0 | Pneumonia | death in hospital |
| K.B. | m | 92 | 50,6 | 82,9 | 7.251 | 93,6 | -5,6 | 21,8 | Pneumonia | death in hospital |
| E.S: | m | 72 | 47,8 | 61,2 | 7.392 | 91,1 | 2,7 | 28,4 | Pneumonia | death in hospital |
| W.W | m | 84 | 47,2 | 67,1 | 7.435 | 94,0 | 6,0 | 31,0 | Pneumonia | death in hospital |
| K.S. | m | 86 | 46,2 | 140,6 | 7.428 | 99,2 | 4,9 | 29,8 | Pneumonia | death in hospital |
| H.J. | m | 76 | 46,0 | 72,1 | 7.419 | 94,8 | 3,9 | 29,1 | Pneumonia | death in hospital |
| G.T. | m | 82 | 45,3 | 56,3 | 7.375 | 88,1 | 0,3 | 25,9 | Pneumonia | death in hospital |
| M.B. | w | 89 | 66,7 | 40,1 | 7.327 | 71,7 | 6,5 | 34,2 | Pneumonia | death 1 year |
| K.K. | w | 93 | 61,6 | 24,9 | 7.339 | 63,5 | 4,8 | 32,4 | Pneumonia | death 1 year |
| L.E. | w | 89 | 57,5 | 22,7 | 7.342 | 35,4 | 3,8 | 30,5 | Pneumonia | death 1 year |
| I.S. | w | 89 | 57,4 | 178 | 7.313 | 99,4 | 0,9 | 28,4 | Pneumonia | death 1 year |
| H.C. | w | 84 | 53,3 | 77,7 | 7.293 | 93,5 | -2,0 | 25,2 | Pneumonia | death 1 year |
| A.K. | m | 81 | 51,5 | 57,8 | 7.368 | 88,9 | 2,6 | 29,0 | Pneumonia | death 1 year |
| C.K. | w | 82 | 50,0 | 52,8 | 7.316 | 83,4 | -1,8 | 25,0 | Pneumonia | death 1 year |
| M.F. | w | 74 | 49,3 | 57 | 7.386 | 89,1 | 2,9 | 28,9 | Pneumonia | death 1 year |
| E.S. | m | 92 | 48,9 | 34,6 | 7.369 | 64,5 | 1,9 | 27,5 | Pneumonia | death 1 year |
| E.H. | w | 73 | 48,8 | 80,2 | 7.388 | 95,7 | 3,3 | 28,8 | Pneumonia | death 1 year |
| F.S. | w | 90 | 45,6 | 68,2 | 7.432 | 94,2 | 4,7 | 29,7 | Pneumonia | death 1 year |
| H.R. | m | 84 | 45,4 | 52,8 | 7.459 | 89,5 | 6,7 | 31,5 | Pneumonia | death 1 year |
| D.K. | w | 80 | 45,2 | 46,6 | 7.341 | 79,1 | -2,0 | 23,9 | Pneumonia | death 1 year |
| M.S. | m | 21 | 90,8 | 86,0 | 7.138 | 92,1 | -2,4 | 30,1 | Pneumonia | alive |
| G.S. | m | 59 | 72,8 | 68,2 | 7.208 | 88,2 | -1,2 | 28,4 | Pneumonia | alive |
| H.B. | m | 60 | 72,0 | 52,5 | 7.322 | 84,6 | 8,0 | 36,5 | Pneumonia | alive |
| I.B. | w | 87 | 67,4 | 42,7 | 7.273 | 71 | 1,9 | 30,5 | Pneumonia | alive |
| B.K. | w | 66 | 60,0 | 82,4 | 7.413 | 96,5 | 11,0 | 37,4 | Pneumonia | alive |
| H.V. | m | 75 | 54,6 | 35,8 | 7.383 | 68,3 | 5,6 | 31,8 | Pneumonia | alive |
| A.K. | m | 76 | 54,3 | 46,2 | 7.425 | 84,1 | 8,7 | 34,8 | Pneumonia | alive |
| O.W. | w | 93 | 53,9 | 76,9 | 7.384 | 95,1 | 4,9 | 31,5 | Pneumonia | alive |
| I.P. | w | 81 | 53,1 | 23,0 | 7.373 | 38,0 | 3,8 | 30,2 | Pneumonia | alive |
| W.C. | m | 71 | 52,9 | 33,7 | 7.468 | 72,0 | 12,1 | 37,4 | Pneumonia | alive |
| W.G. | w | 34 | 52,4 | 30,4 | 7.278 | 47,9 | -3,3 | 24,0 | Pneumonia | alive |
| E.A. | w | 74 | 51,0 | 70,6 | 7.401 | 94,2 | 5,3 | 31 | Pneumonia | alive |
| B.E. | w | 78 | 50,6 | 51,7 | 7.403 | 86,9 | 4,9 | 30,9 | Pneumonia | alive |
| G.S. | m | 59 | 49,8 | 32,3 | 7.329 | 56,5 | -0,8 | 25,6 | Pneumonia | alive |
| B.M. | m | 76 | 49,2 | 44,4 | 7.432 | 82,6 | 6,7 | 32,1 | Pneumonia | alive |
| M.S. | w | 72 | 49,1 | 56,3 | 7.360 | 87,7 | 0,9 | 27,1 | Pneumonia | alive |
| M.E. | w | 80 | 48,9 | 82,7 | 7.441 | 96,7 | 7,0 | 32,5 | Pneumonia | alive |
| I.S. | w | 91 | 48,4 | 63,9 | 7.329 | 90,1 | -1,5 | 24,8 | Pneumonia | alive |
| D.G. | m | 84 | 47,9 | 144,0 | 7.435 | 99,3 | 6,5 | 31,5 | Pneumonia | alive |
| L.V. | m | 61 | 47,5 | 32,8 | 7.346 | 58,8 | -0,6 | 25,4 | Pneumonia | alive |
| H.V. | m | 75 | 46,6 | 40,9 | 7.404 | 76,8 | 3,0 | 28,5 | Pneumonia | alive |
| M.H. | w | 53 | 46,6 | 68,0 | 7.397 | 93,4 | 2,6 | 28,1 | Pneumonia | alive |
| D.H. | m | 30 | 46,2 | 18,6 | 7.354 | 25,0 | -0,8 | 25,2 | Pneumonia | alive |
| R.L. | w | 77 | 46,2 | 71,1 | 7.386 | 93,9 | 1,8 | 27,1 | Pneumonia | alive |
| H.J. | m | 52 | 46,1 | 47,8 | 7.381 | 82,6 | 1,1 | 26,8 | Pneumonia | alive |
| G.G. | w | 87 | 45,4 | 41,2 | 7.359 | 74,0 | -0,7 | 25,0 | Pneumonia | alive |
| H.T. | m | 74 | 45,3 | 34,0 | 7.374 | 63,4 | 0,4 | 25,9 | Pneumonia | alive |
| J.H. | w | 86 | 45,2 | 55,7 | 7.460 | 90,9 | 6,7 | 31,4 | Pneumonia | alive |
| I.M. | w | 71 | 96,3 | 45,5 | 7.341 | 81,0 | 19,9 | 50,9 | AE COPD | death in hospital |
| P.D. | m | 56 | 76,8 | 165,4 | 7.256 | 99,2 | 3,6 | 33,4 | AE COPD | death in hospital |
| K.B. | m | 75 | 74,4 | 29,0 | 7.378 | 55,8 | 13,7 | 42,8 | AE COPD | death in hospital |
| M.R. | w | 84 | 72,4 | 67,9 | 7.305 | 91,6 | 7,2 | 35,2 | AE COPD | death in hospital |
| V.M. | w | 49 | 66,2 | 54,5 | 7.311 | 85,0 | 4,1 | 32,6 | AE COPD | death in hospital |
| S.C. | w | 83 | 62,3 | 62,5 | 7.326 | 89,8 | 3,8 | 31,8 | AE COPD | death in hospital |
| I.K. | w | 85 | 61,2 | 320 | 7.297 | 99,9 | 1,2 | 29,2 | AE COPD | death in hospital |
| K.W. | w | 46 | 56,9 | 72,8 | 7.317 | 92,9 | 1,8 | 28,4 | AE COPD | death in hospital |
| H.G. | m | 57 | 56,9 | 82,5 | 7.398 | 96,3 | 7,9 | 34,3 | AE COPD | death in hospital |
| H.S. | m | 67 | 55,8 | 31,0 | 7.264 | 48,2 | -3,4 | 24,7 | AE COPD | death in hospital |
| K.E. | m | 93 | 55,8 | 110 | 7.372 | 98,2 | 5,0 | 31,7 | AE COPD | death in hospital |
| H.P. | m | 65 | 54,8 | 116 | 7.331 | 98,2 | 1,4 | 28,3 | AE COPD | death in hospital |
| M.A. | m | 60 | 53,6 | 71,6 | 7.471 | 95,8 | 12,8 | 38,2 | AE COPD | death in hospital |
| B.M. | w | 67 | 52,1 | 189 | 7.307 | 99,5 | -1,2 | 25,5 | AE COPD | death in hospital |
| W.H. | m | 71 | 52,0 | 93,5 | 7.388 | 97,2 | 4,6 | 30,6 | AE COPD | death in hospital |
| H.W. | m | 72 | 49,0 | 79,2 | 7.441 | 96,3 | 7,5 | 32,6 | AE COPD | death in hospital |
| K.G. | m | 82 | 48,6 | 41,4 | 7.400 | 77,3 | 3,7 | 29,4 | AE COPD | death in hospital |
| G.L. | w | 84 | 48,5 | 100 | 7.445 | 98,1 | 7,4 | 32,6 | AE COPD | death in hospital |
| M.R. | w | 76 | 47,9 | 125,8 | 7.442 | 99,0 | 7,0 | 32,0 | AE COPD | death in hospital |
| G.T. | m | 65 | 47,4 | 126,8 | 7.398 | 98,9 | 3,2 | 28,6 | AE COPD | death in hospital |
| H.A. | m | 76 | 46,3 | 58,5 | 7.494 | 93 | 10,6 | 34,9 | AE COPD | death in hospital |
| H.H. | m | 70 | 45,6 | 153,3 | 7.372 | 99,3 | 0,2 | 25,9 | AE COPD | death in hospital |
| A.S. | m | 74 | 109,4 | 95,9 | 7.099 | 93,5 | 0,9 | 33,2 | AE COPD | death 1 year |
| A.B. | w | 67 | 88,1 | 70,7 | 7.342 | 93,7 | 16,7 | 46,6 | AE COPD | death 1 year |
| H.P. | m | 65 | 69,7 | 19,6 | 7.320 | 26,9 | 6,9 | 35,1 | AE COPD | death 1 year |
| K.T. | w | 90 | 69,5 | 59,7 | 7.432 | 92,5 | 17,6 | 45,3 | AE COPD | death 1 year |
| A.S. | m | 74 | 68,7 | 64,2 | 7.262 | 88,5 | 1,8 | 30,3 | AE COPD | death 1 year |
| M.H. | w | 73 | 63,7 | 69 | 7.321 | 92 | 3,7 | 32,1 | AE COPD | death 1 year |
| A.B. | w | 67 | 61,5 | 74,0 | 7.391 | 94,9 | 9,1 | 36,4 | AE COPD | death 1 year |
| H.S. | m | 70 | 59,0 | 63,3 | 7.346 | 90,8 | 4,4 | 31,6 | AE COPD | death 1 year |
| G.P. | m | 70 | 58,7 | 35,0 | 7.321 | 61,8 | 2,0 | 29,6 | AE COPD | death 1 year |
| H.G. | m | 57 | 57,6 | 67,3 | 7.334 | 91,7 | 2,3 | 29,9 | AE COPD | death 1 year |
| R.R. | w | 61 | 56,5 | 47,3 | 7.376 | 82,6 | 6,2 | 32,4 | AE COPD | death 1 year |
| A.E. | w | 86 | 56,2 | 80,6 | 7.314 | 94,6 | 0,6 | 27,9 | AE COPD | death 1 year |
| S.S. | w | 67 | 56,2 | 86,8 | 7.409 | 96,9 | 8,1 | 34,8 | AE COPD | death 1 year |
| D.N. | w | 71 | 55,6 | 109,2 | 7.377 | 98,2 | 5,6 | 31,9 | AE COPD | death 1 year |
| G.S. | m | 70 | 54,8 | 52,9 | 7.362 | 86,0 | 3,6 | 30,4 | AE COPD | death 1 year |
| H.H. | w | 69 | 54,5 | 43,7 | 7.422 | 81,7 | 8,4 | 34,7 | AE COPD | death 1 year |
| G.W. | w | 73 | 53,7 | 46,9 | 7.450 | 85,9 | 10,8 | 36,5 | AE COPD | death 1 year |
| H.S. | m | 80 | 53,5 | 79,1 | 7.432 | 96,3 | 9,3 | 34,9 | AE COPD | death 1 year |
| H.B. | w | 68 | 53,4 | 47,9 | 7.386 | 83,4 | 4,8 | 31,3 | AE COPD | death 1 year |
| A.B. | w | 67 | 53,2 | 66,9 | 7.398 | 93,2 | 5,7 | 32,1 | AE COPD | death 1 year |
| H.G. | m | 57 | 53,1 | 63,5 | 7.410 | 92,6 | 6,7 | 32,9 | AE COPD | death 1 year |
| A.R. | w | 64 | 53,1 | 67,6 | 7.345 | 92,1 | 1,9 | 28,3 | AE COPD | death 1 year |
| K.B. | m | 63 | 52,1 | 63 | 7.360 | 90,9 | 2,2 | 28,7 | AE COPD | death 1 year |
| U.M. | w | 78 | 51,6 | 78,4 | 7.457 | 96,5 | 10,2 | 35,6 | AE COPD | death 1 year |
| F.B. | m | 63 | 51,4 | 47,3 | 7.361 | 81,3 | 2 | 28,4 | AE COPD | death 1 year |
| K.B. | m | 63 | 50,9 | 59,8 | 7.375 | 90,0 | 2,7 | 29,0 | AE COPD | death 1 year |
| R.F. | m | 58 | 50,3 | 230,0 | 7.386 | 99,8 | 3,8 | 29,5 | AE COPD | death 1 year |
| I.O. | w | 63 | 50,1 | 68,8 | 7.385 | 93,4 | 3,2 | 29,3 | AE COPD | death 1 year |
| E.F. | w | 64 | 49,8 | 62,5 | 7.383 | 91,3 | 2,9 | 29,0 | AE COPD | death 1 year |
| K.G. | m | 96 | 49,3 | 31,8 | 7.342 | 56,5 | 0,3 | 26,1 | AE COPD | death 1 year |
| G.K. | m | 61 | 49,2 | 104 | 7.378 | 97,9 | 2,7 | 28,3 | AE COPD | death 1 year |
| W.B. | m | 74 | 49,2 | 88,7 | 7.405 | 96,9 | 4,3 | 30,1 | AE COPD | death 1 year |
| H.G. | m | 58 | 48,9 | 44,4 | 7.392 | 80,2 | 3,0 | 29,0 | AE COPD | death 1 year |
| G.K. | m | 61 | 48,9 | 164 | 7.330 | 99,3 | -1,1 | 25,2 | AE COPD | death 1 year |
| M.M. | m | 71 | 48,5 | 68,3 | 7.433 | 94,3 | 6,2 | 31,7 | AE COPD | death 1 year |
| K.H. | w | 89 | 48,3 | 65,1 | 7.421 | 93,2 | 5,1 | 30,7 | AE COPD | death 1 year |
| V.T. | w | 86 | 48,0 | 68,2 | 7.439 | 94,4 | 6,5 | 31,8 | AE COPD | death 1 year |
| H.B. | w | 77 | 47,3 | 57,8 | 7.392 | 89,6 | 2,4 | 28,1 | AE COPD | death 1 year |
| H.B. | w | 69 | 47,0 | 55,3 | 7.399 | 88,6 | 2,8 | 28,4 | AE COPD | death 1 year |
| W.B. | m | 74 | 47,0 | 98,3 | 7.410 | 97,7 | 3,7 | 29,1 | AE COPD | death 1 year |
| L.K. | w | 77 | 47,0 | 40,9 | 7.479 | 81,6 | 9,2 | 34,2 | AE COPD | death 1 year |
| U.W. | w | 75 | 46,7 | 93,3 | 7.442 | 97,7 | 6,0 | 31,1 | AE COPD | death 1 year |
| S.L. | m | 83 | 46,6 | 31,9 | 7.387 | 60,5 | 2,2 | 27,5 | AE COPD | death 1 year |
| H.B. | w | 77 | 46,5 | 70,6 | 7.401 | 94,1 | 2,7 | 28,2 | AE COPD | death 1 year |
| B.B. | m | 82 | 46,2 | 63,9 | 7.482 | 94,2 | 9,2 | 33,8 | AE COPD | death 1 year |
| U.R. | w | 55 | 46,1 | 28,7 | 7.425 | 56,7 | 4,5 | 29,6 | AE COPD | death 1 year |
| H.S. | m | 81 | 45,9 | 84,3 | 7.308 | 94,9 | -3,7 | 22,5 | AE COPD | death 1 year |
| E.A. | m | 87 | 45,6 | 77,2 | 7.358 | 94,6 | -0,8 | 25,1 | AE COPD | death 1 year |
| A.K. | w | 77 | 45,6 | 58,7 | 7.393 | 90,0 | 1,7 | 27,2 | AE COPD | death 1 year |
| H.G. | m | 74 | 45,3 | 58,3 | 7.386 | 89,6 | 1,1 | 26,6 | AE COPD | death 1 year |
| R.S. | w | 68 | 45,2 | 60,6 | 7.396 | 90,9 | 1,7 | 27,1 | AE COPD | death 1 year |
| H.M. | m | 66 | 93,1 | 40,2 | 7.285 | 70,1 | 12,8 | 43,2 | AE COPD | alive |
| G.R. | w | 82 | 83,0 | 59,6 | 7.323 | 98,1 | 12,0 | 42,1 | AE COPD | alive |
| K.K. | m | 86 | 80,3 | 104,6 | 7.280 | 97,2 | 7,5 | 36,9 | AE COPD | alive |
| B.L. | m | 67 | 80,1 | 59,3 | 7.282 | 87,2 | 6,9 | 36,9 | AE COPD | alive |
| E.H. | w | 50 | 79,3 | 39,8 | 7.322 | 71,5 | 10,2 | 40,1 | AE COPD | alive |
| C.H. | w | 66 | 79,3 | 83,4 | 7.349 | 96,0 | 13,8 | 42,7 | AE COPD | alive |
| H.B. | w | 67 | 76,1 | 59,2 | 7.321 | 88,6 | 8,9 | 38,4 | AE COPD | alive |
| I.S. | m | 65 | 74,1 | 39,0 | 7.281 | 66,5 | 4,2 | 34,1 | AE COPD | alive |
| R.S. | m | 61 | 72,1 | 57,0 | 7.334 | 87,9 | 8,5 | 37,5 | AE COPD | alive |
| M.K. | w | 74 | 71,6 | 79,5 | 7.282 | 93,9 | 4,3 | 33,1 | AE COPD | alive |
| L.R. | m | 67 | 70,9 | 29,1 | 7.301 | 48,6 | 5,3 | 34,2 | AE COPD | alive |
| E.H. | w | 57 | 70,7 | 71,7 | 7.285 | 92 | 3,2 | 32,9 | AE COPD | alive |
| S.A. | m | 73 | 69,9 | 59,9 | 7.239 | 85,1 | -0,8 | 29,2 | AE COPD | alive |
| B.S. | m | 55 | 69,6 | 77,7 | 7.281 | 93,5 | 2,8 | 32,0 | AE COPD | alive |
| U.W. | m | 61 | 68,9 | 17,1 | 7.266 | 18,5 | 1,4 | 30,7 | AE COPD | alive |
| B.K. | w | 66 | 68,9 | 98,1 | 7.336 | 97,2 | 8 | 36 | AE COPD | alive |
| K.H. | w | 73 | 68,5 | 45,7 | 7.407 | 83,5 | 13,6 | 42,2 | AE COPD | alive |
| E.I. | w | 79 | 68,2 | 42,6 | 7.336 | 75,8 | 8,0 | 35,7 | AE COPD | alive |
| E.R. | w | 59 | 67,8 | 79,9 | 7.285 | 94,0 | 2,5 | 31,5 | AE COPD | alive |
| A.B. | w | 68 | 66,6 | 25,9 | 7.394 | 48,8 | 11,7 | 39,7 | AE COPD | alive |
| S.B. | w | 69 | 66,5 | 47,5 | 7.222 | 73,1 | -2,9 | 26,8 | AE COPD | alive |
| H.A. | m | 72 | 65,7 | 28,5 | 7.313 | 47,8 | 4,2 | 32,6 | AE COPD | alive |
| U.W. | w | 78 | 65,3 | 38,4 | 7.271 | 64,1 | 1,1 | 29,4 | AE COPD | alive |
| H.S. | w | 49 | 65,1 | 49,6 | 7.300 | 80,5 | 3,0 | 31,3 | AE COPD | alive |
| A.B. | w | 67 | 65,0 | 71,6 | 7.443 | 95,5 | 15,7 | 43,3 | AE COPD | alive |
| H.S. | w | 48 | 64,6 | 73,3 | 7.256 | 91,5 | -0,7 | 28,1 | AE COPD | alive |
| G.S. | m | 58 | 63,9 | 59,1 | 7.268 | 85,8 | -0,1 | 28,5 | AE COPD | alive |
| H.K. | m | 80 | 63,0 | 55,4 | 7.386 | 88,9 | 9,9 | 37,0 | AE COPD | alive |
| U.M. | w | 78 | 62,8 | 77,9 | 7.408 | 95,9 | 11,2 | 38,8 | AE COPD | alive |
| R.S. | m | 60 | 62,4 | 58,8 | 7.360 | 89,5 | 6,8 | 34,5 | AE COPD | alive |
| K.H. | m | 79 | 61,9 | 76,8 | 7.374 | 95,1 | 7,7 | 35,3 | AE COPD | alive |
| M.T. | m | 76 | 61,7 | 43,4 | 7.179 | 63,9 | -6,7 | 22,4 | AE COPD | alive |
| N.P. | w | 46 | 60,5 | 61,8 | 7.312 | 89,0 | 2,0 | 29,9 | AE COPD | alive |
| A.S. | w | 82 | 60,5 | 44,2 | 7.349 | 78,0 | 5,0 | 32,6 | AE COPD | alive |
| C.L. | w | 81 | 60,3 | 69,3 | 7.344 | 92,7 | 4,5 | 32,1 | AE COPD | alive |
| A.G. | m | 59 | 60,0 | 51,8 | 7.372 | 85,9 | 6,6 | 34,0 | AE COPD | alive |
| K.F. | m | 62 | 59,9 | 64,6 | 7.348 | 91,3 | 4,6 | 32,2 | AE COPD | alive |
| A.H. | w | 52 | 59,7 | 82,1 | 7.325 | 95,1 | 2,7 | 30,4 | AE COPD | alive |
| G.S. | m | 86 | 59,3 | 21,6 | 7.311 | 30,2 | 1,3 | 29,3 | AE COPD | alive |
| M.T. | m | 76 | 58,8 | 25,1 | 7.313 | 39,1 | 1,7 | 29,1 | AE COPD | alive |
| J.D. | m | 60 | 58,8 | 62,3 | 7.370 | 91,2 | 6,0 | 33,2 | AE COPD | alive |
| K.K. | m | 76 | 58,6 | 30,9 | 7.436 | 64,0 | 12,4 | 38,5 | AE COPD | alive |
| W.F. | m | 83 | 58,6 | 44,4 | 7.473 | 85,3 | 15,3 | 42,0 | AE COPD | alive |
| H.W. | w | 58 | 58,4 | 68,5 | 7.323 | 91,8 | 2 | 29,6 | AE COPD | alive |
| G.S. | w | 64 | 58,3 | 145 | 7.298 | 98,9 | 0,1 | 27,9 | AE COPD | alive |
| I.G. | m | 60 | 58,1 | 26,6 | 7.350 | 45,7 | 4,2 | 31,3 | AE COPD | alive |
| A.H. | w | 56 | 57,8 | 62,0 | 7.345 | 90,2 | 3,5 | 30,8 | AE COPD | alive |
| E.L. | w | 57 | 57,7 | 74,3 | 7.350 | 94,1 | 3,7 | 31,1 | AE COPD | alive |
| R.H. | w | 76 | 57,6 | 26,2 | 7.266 | 37,7 | -2,4 | 25,6 | AE COPD | alive |
| F.B. | m | 63 | 57,6 | 43,4 | 7.375 | 78,6 | 5,8 | 32,9 | AE COPD | alive |
| R.G. | w | 58 | 57,6 | 90,8 | 7.314 | 96,1 | 0,9 | 28,6 | AE COPD | alive |
| H.D. | w | 65 | 57,2 | 50,5 | 7.312 | 81,6 | 0,7 | 28,3 | AE COPD | alive |
| E.S. | w | 69 | 57,1 | 59,3 | 7.417 | 91,4 | 9,2 | 36,0 | AE COPD | alive |
| E.N. | w | 82 | 57,1 | 56,0 | 7.401 | 89,5 | 7,8 | 34,7 | AE COPD | alive |
| H.G. | m | 60 | 57,0 | 41,7 | 7.364 | 75,6 | 4,1 | 31,7 | AE COPD | alive |
| E.N. | w | 82 | 56,8 | 35,1 | 7.404 | 69,1 | 8,2 | 34,8 | AE COPD | alive |
| W.F. | m | 70 | 56,3 | 80,1 | 7.339 | 94,9 | 2,4 | 29,6 | AE COPD | alive |
| M.R. | w | 72 | 56,2 | 46,9 | 7.346 | 80,4 | 3,0 | 30,0 | AE COPD | alive |
| D.H. | m | 53 | 56,2 | 77,5 | 7.388 | 95,4 | 6,3 | 33,1 | AE COPD | alive |
| B.K. | m | 56 | 55,9 | 45,2 | 7.361 | 79,5 | 3,9 | 30,9 | AE COPD | alive |
| H.R. | w | 83 | 55,8 | 40,8 | 7.390 | 76,4 | 6,7 | 33,1 | AE COPD | alive |
| G.K. | m | 60 | 55,7 | 66,3 | 7.376 | 92,6 | 5,1 | 31,9 | AE COPD | alive |
| G.S. | m | 58 | 55,6 | 60,5 | 7.359 | 89,9 | 3,6 | 30,6 | AE COPD | alive |
| M.R. | w | 51 | 55,6 | 52,8 | 7.370 | 86,3 | 4,7 | 31,4 | AE COPD | alive |
| B.K. | m | 56 | 55,5 | 46,9 | 7.446 | 85,7 | 11,0 | 37,4 | AE COPD | alive |
| G.M. | w | 79 | 55,4 | 56,6 | 7.343 | 87,4 | 2,3 | 29,4 | AE COPD | alive |
| U.W. | m | 60 | 55,4 | 60,8 | 7.370 | 90,4 | 4,4 | 31,3 | AE COPD | alive |
| E.G. | w | 85 | 54,9 | 26,9 | 7.409 | 51,8 | 8,1 | 33,9 | AE COPD | alive |
| B.B. | w | 54 | 54,9 | 85,4 | 7.370 | 96,2 | 4,1 | 31,0 | AE COPD | alive |
| N.P. | w | 46 | 54,8 | 63,3 | 7.362 | 91,1 | 3,5 | 30,4 | AE COPD | alive |
| W.F. | m | 70 | 54,7 | 89,8 | 7.396 | 97,0 | 6,2 | 32,8 | AE COPD | alive |
| S.S. | m | 61 | 54,5 | 56 | 7.376 | 88,4 | 4,6 | 31,3 | AE COPD | alive |
| A.R. | m | 59 | 54,5 | 56,8 | 7.392 | 89,4 | 5,9 | 32,5 | AE COPD | alive |
| I.L. | w | 68 | 54,4 | 59,7 | 7.332 | 88,6 | 1,1 | 28,2 | AE COPD | alive |
| H.B. | m | 60 | 54,2 | 41,4 | 7.366 | 75,3 | 3,6 | 30,4 | AE COPD | alive |
| M.D. | m | 20 | 54,2 | 112,0 | 7.318 | 97,8 | -0,1 | 27,2 | AE COPD | alive |
| R.K. | m | 60 | 54,1 | 49 | 7.326 | 81 | 0,4 | 27,6 | AE COPD | alive |
| W.K. | w | 62 | 54,1 | 22,9 | 7.354 | 36,2 | 2,7 | 29,4 | AE COPD | alive |
| K.S. | w | 52 | 54,0 | 126 | 7.406 | 98,9 | 7,5 | 33,1 | AE COPD | alive |
| H.S. | w | 49 | 53,9 | 23,4 | 7.317 | 34,7 | -0,2 | 26,9 | AE COPD | alive |
| M.M. | m | 71 | 53,8 | 41,7 | 7.367 | 75,8 | 4,0 | 30,2 | AE COPD | alive |
| H.K. | w | 75 | 53,6 | 59,1 | 7.361 | 89,3 | 3,0 | 29,7 | AE COPD | alive |
| H.B. | m | 79 | 53,4 | 39,6 | 7.350 | 71,6 | 2,0 | 28,8 | AE COPD | alive |
| U.W. | w | 78 | 53,2 | 66,9 | 7.398 | 93,2 | 5,7 | 32,1 | AE COPD | alive |
| R.K. | w | 73 | 53,1 | 73,7 | 7.413 | 95,1 | 6,9 | 33,1 | AE COPD | alive |
| A.M. | w | 50 | 53,1 | 64,8 | 7.443 | 93,8 | 9,5 | 35,5 | AE COPD | alive |
| B.K. | w | 66 | 52,9 | 105 | 7.389 | 98,0 | 5,4 | 31,3 | AE COPD | alive |
| R.M. | m | 89 | 52,9 | 27,7 | 7.387 | 51,4 | 4,5 | 31,1 | AE COPD | alive |
| K.H. | m | 70 | 52,9 | 47,5 | 7.377 | 82,6 | 3,9 | 30,4 | AE COPD | alive |
| W.F. | m | 71 | 52,8 | 80,9 | 7.395 | 95,9 | 5,2 | 31,6 | AE COPD | alive |
| G.W. | m | 73 | 52,2 | 29,2 | 7.365 | 53 | 2,6 | 29,1 | AE COPD | alive |
| A.B. | w | 68 | 52,1 | 83,8 | 7.377 | 96,1 | 3,5 | 29,9 | AE COPD | alive |
| H.B. | m | 60 | 52,1 | 122 | 7.371 | 98,6 | 3,1 | 29,5 | AE COPD | alive |
| B.L. | m | 67 | 52,0 | 59,7 | 7.391 | 90,6 | 4,6 | 30,9 | AE COPD | alive |
| B.L. | m | 67 | 51,8 | 69,2 | 7.377 | 93,3 | 3,4 | 29,8 | AE COPD | alive |
| W.H. | m | 67 | 51,8 | 68,8 | 7.325 | 91,8 | -0,4 | 26,4 | AE COPD | alive |
| K.K. | m | 77 | 51,7 | 94,0 | 7.378 | 97,2 | 3,7 | 29,8 | AE COPD | alive |
| W.L. | m | 73 | 51,7 | 98,4 | 7.369 | 97,4 | 2,6 | 29,2 | AE COPD | alive |
| L.R. | m | 67 | 51,6 | 73,3 | 7.381 | 94,4 | 3,6 | 29,9 | AE COPD | alive |
| L.F. | w | 75 | 51,5 | 46,8 | 7.369 | 81,3 | 2,8 | 29,0 | AE COPD | alive |
| A.G. | w | 60 | 51,4 | 71,8 | 7.383 | 94,1 | 3,6 | 29,9 | AE COPD | alive |
| K.H. | m | 60 | 51,4 | 58,2 | 7.383 | 89,6 | 3,7 | 29,9 | AE COPD | alive |
| G.K. | m | 61 | 51,3 | 124,8 | 7.420 | 98,9 | 6,9 | 32,5 | AE COPD | alive |
| M.B. | m | 61 | 51,3 | 114 | 7.356 | 98,2 | 1,6 | 28,1 | AE COPD | alive |
| H.S. | m | 71 | 51,2 | 93,9 | 7.305 | 96,3 | -2,1 | 25,0 | AE COPD | alive |
| E.D: | m | 82 | 51,1 | 62,8 | 7.370 | 91,1 | 2,5 | 28,9 | AE COPD | alive |
| A.P. | m | 47 | 51,1 | 54,1 | 7.418 | 88,9 | 6,3 | 32,3 | AE COPD | alive |
| M.H. | m | 59 | 51,0 | 60,9 | 7.382 | 90,8 | 3,4 | 29,6 | AE COPD | alive |
| D.H. | m | 54 | 50,9 | 77,4 | 7.398 | 95,4 | 4,6 | 30,6 | AE COPD | alive |
| H.D. | w | 68 | 50,9 | 45,0 | 7.352 | 78,5 | 1,2 | 27,7 | AE COPD | alive |
| H.L. | w | 82 | 50,9 | 38,0 | 7.441 | 76,0 | 8,3 | 33,8 | AE COPD | alive |
| A.H. | m | 75 | 50,8 | 28,2 | 7.356 | 49,6 | 1,3 | 27,8 | AE COPD | alive |
| K.F. | m | 63 | 50,7 | 64,4 | 7.381 | 92,0 | 3,2 | 29,4 | AE COPD | alive |
| C.G. | m | 77 | 50,7 | 62 | 7.414 | 92,1 | 5,8 | 31,7 | AE COPD | alive |
| E.W. | m | 68 | 50,7 | 55,6 | 7.379 | 88,2 | 3,1 | 29,3 | AE COPD | alive |
| K.F. | m | 86 | 50,6 | 32,2 | 7.341 | 57,5 | 0,4 | 26,8 | AE COPD | alive |
| I.P. | w | 72 | 50,6 | 57,5 | 7.412 | 90,3 | 5,6 | 31,5 | AE COPD | alive |
| G.K. | w | 78 | 50,5 | 63,8 | 7.348 | 90,8 | 0,7 | 27,1 | AE COPD | alive |
| C.B. | w | 79 | 50,5 | 89,2 | 7.358 | 96,4 | 1,7 | 27,8 | AE COPD | alive |
| J.S. | m | 61 | 50,3 | 48,2 | 7.368 | 82,5 | 2,0 | 28,3 | AE COPD | alive |
| H.S. | w | 49 | 50,2 | 83,7 | 7.387 | 96,2 | 3,4 | 29,5 | AE COPD | alive |
| K.S. | m | 74 | 50,2 | 47,3 | 7.484 | 87,5 | 11,5 | 36,9 | AE COPD | alive |
| C.H. | w | 66 | 50,2 | 72,9 | 7.370 | 94,0 | 2,1 | 28,4 | AE COPD | alive |
| R.K. | w | 80 | 50,2 | 102,9 | 7.294 | 97,0 | -3,2 | 23,8 | AE COPD | alive |
| A.W. | m | 77 | 50,1 | 56,0 | 7.389 | 88,7 | 3,7 | 29,6 | AE COPD | alive |
| C.L. | w | 82 | 50,1 | 78,2 | 7.438 | 96,2 | 7,4 | 33,1 | AE COPD | alive |
| H.F. | m | 76 | 50,0 | 40,4 | 7.452 | 79,9 | 8,8 | 34,2 | AE COPD | alive |
| T.M. | m | 68 | 50,0 | 57,2 | 7.368 | 88,5 | 1,9 | 28,1 | AE COPD | alive |
| J.S. | m | 60 | 50,0 | 61,0 | 7.432 | 92,3 | 6,9 | 32,6 | AE COPD | alive |
| E.W. | m | 67 | 50,0 | 60,2 | 7.333 | 88,7 | -0,6 | 26,0 | AE COPD | alive |
| P.M. | m | 82 | 49,9 | 57,8 | 7.405 | 90,2 | 4,8 | 30,5 | AE COPD | alive |
| H.S. | w | 48 | 49,9 | 36,9 | 7.392 | 70,5 | 3,7 | 29,7 | AE COPD | alive |
| E.G. | w | 62 | 49,8 | 53,2 | 7.419 | 88,4 | 5,8 | 31,5 | AE COPD | alive |
| K.K. | m | 64 | 49,7 | 52,9 | 7.411 | 87,9 | 5,0 | 30,9 | AE COPD | alive |
| B.L. | w | 42 | 49,7 | 56,5 | 7.376 | 88,4 | 2,3 | 28,4 | AE COPD | alive |
| H.L. | m | 73 | 49,5 | 59,9 | 7.441 | 92,1 | 7,3 | 32,9 | AE COPD | alive |
| E.F. | w | 73 | 49,4 | 24,4 | 7.322 | 37,2 | -1,6 | 25,0 | AE COPD | alive |
| B.L. | w | 42 | 49,1 | 55,9 | 7.374 | 88,0 | 1,9 | 28,0 | AE COPD | alive |
| W.B. | m | 73 | 49,0 | 80,0 | 7.356 | 95,1 | 0,6 | 26,8 | AE COPD | alive |
| I.O. | w | 63 | 49,0 | 20,5 | 7.320 | 27,7 | -1,7 | 24,7 | AE COPD | alive |
| R.V. | w | 54 | 48,9 | 94,6 | 7.288 | 96,1 | -4,1 | 22,9 | AE COPD | alive |
| G.K. | w | 77 | 48,9 | 49,7 | 7.404 | 85,5 | 4,1 | 29,9 | AE COPD | alive |
| O.M. | m | 66 | 48,9 | 61,4 | 7.481 | 93,6 | 10,5 | 35,7 | AE COPD | alive |
| W.S. | m | 61 | 48,9 | 52,8 | 7.383 | 86,6 | 2,5 | 28,5 | AE COPD | alive |
| F.K. | w | 61 | 48,8 | 65,3 | 7.420 | 93,2 | 5,3 | 30,9 | AE COPD | alive |
| S.S. | m | 46 | 48,8 | 64,0 | 7.363 | 91,3 | 1,0 | 27,2 | AE COPD | alive |
| H.A. | m | 55 | 48,8 | 52 | 7.415 | 87,5 | 4,9 | 30,6 | AE COPD | alive |
| K.K. | m | 79 | 48,6 | 47,3 | 7.373 | 81,9 | 1,6 | 27,7 | AE COPD | alive |
| H.K. | m | 80 | 48,6 | 54,1 | 7.394 | 87,8 | 3,2 | 29,1 | AE COPD | alive |
| K.S. | m | 48 | 48,5 | 62 | 7.406 | 91,8 | 4,1 | 29,8 | AE COPD | alive |
| H.V. | w | 69 | 48,4 | 63,3 | 7.362 | 91,0 | 0,9 | 26,9 | AE COPD | alive |
| K.S. | m | 73 | 48,4 | 54,9 | 7.359 | 86,8 | 0,5 | 26,7 | AE COPD | alive |
| K.K. | m | 79 | 48,3 | 50,4 | 7.386 | 85,0 | 2,4 | 28,3 | AE COPD | alive |
| E.F. | w | 73 | 48,3 | 49,9 | 7.398 | 85,3 | 3,4 | 29,1 | AE COPD | alive |
| H.K. | w | 74 | 48,2 | 55,6 | 7.370 | 87,7 | 1,2 | 27,2 | AE COPD | alive |
| F.K. | w | 61 | 48,2 | 55,1 | 7.493 | 91,8 | 11,1 | 36,1 | AE COPD | alive |
| H.S. | w | 67 | 48,0 | 63,6 | 7.401 | 92,2 | 3,3 | 29,2 | AE COPD | alive |
| J.D. | m | 60 | 48,0 | 46,2 | 7.364 | 80,2 | 0,7 | 26,7 | AE COPD | alive |
| H.K. | m | 80 | 48,0 | 49,2 | 7.381 | 83,9 | 2 | 27,8 | AE COPD | alive |
| P.N. | m | 71 | 47,9 | 71,2 | 7.390 | 94,0 | 2,6 | 28,4 | AE COPD | alive |
| K.G. | w | 86 | 47,9 | 49,9 | 7.450 | 87,6 | 7,3 | 32,5 | AE COPD | alive |
| D.M. | w | 71 | 47,9 | 55,7 | 7.418 | 89,6 | 4,7 | 30,3 | AE COPD | alive |
| A.N. | w | 77 | 47,9 | 61,7 | 7.416 | 92 | 4,6 | 30,1 | AE COPD | alive |
| A.H. | w | 52 | 47,8 | 176,8 | 7.382 | 99,5 | 1,9 | 27,8 | AE COPD | alive |
| U.S. | w | 76 | 47,8 | 31,9 | 7.391 | 61 | 2,9 | 28,4 | AE COPD | alive |
| J.L. | m | 70 | 47,7 | 64,7 | 7.371 | 91,7 | 1,1 | 27,0 | AE COPD | alive |
| B.K. | w | 65 | 47,6 | 69,9 | 7.462 | 95,2 | 8,1 | 33,3 | AE COPD | alive |
| H.A. | m | 71 | 47,5 | 51,1 | 7.352 | 83,8 | -0,4 | 25,7 | AE COPD | alive |
| S.S. | w | 72 | 47,3 | 133 | 7.350 | 99 | -0,5 | 25,5 | AE COPD | alive |
| R.S. | m | 59 | 47,2 | 67,4 | 7.314 | 90,9 | -3,1 | 23,4 | AE COPD | alive |
| H.W. | w | 68 | 47,2 | 48,3 | 7.394 | 83,8 | 2,6 | 28,2 | AE COPD | alive |
| H.L. | m | 75 | 47,2 | 61,3 | 7.344 | 89,5 | -1 | 25,1 | AE COPD | alive |
| E.G. | m | 62 | 47,2 | 71 | 7.425 | 94,7 | 4,9 | 30,3 | AE COPD | alive |
| S.J. | w | 71 | 47,1 | 52,0 | 7.378 | 85,7 | 1,3 | 27,1 | AE COPD | alive |
| I.W. | w | 76 | 47,1 | 38,7 | 7.383 | 72,4 | 1,7 | 27,4 | AE COPD | alive |
| H.H. | w | 72 | 47,1 | 70,3 | 7.401 | 94,0 | 3,0 | 28,6 | AE COPD | alive |
| I.M. | w | 67 | 47,1 | 64,5 | 7.411 | 92,7 | 3,8 | 29,2 | AE COPD | alive |
| E.H. | w | 58 | 47,1 | 58,3 | 7.374 | 89,2 | 1,0 | 26,8 | AE COPD | alive |
| E.K. | w | 62 | 47,0 | 67,1 | 7.388 | 92,9 | 2,0 | 27,7 | AE COPD | alive |
| R.M. | w | 65 | 47,0 | 73,8 | 7.335 | 93,4 | -1,7 | 24,5 | AE COPD | alive |
| E.V. | w | 76 | 47,0 | 57,2 | 7.395 | 89,4 | 2,5 | 28,1 | AE COPD | alive |
| D.L. | m | 55 | 46,8 | 52,4 | 7.429 | 88,2 | 5,0 | 30,3 | AE COPD | alive |
| M.K. | w | 82 | 46,8 | 66,2 | 7.358 | 91,8 | -0,2 | 25,7 | AE COPD | alive |
| U.W. | m | 60 | 46,8 | 68,2 | 7.370 | 92,8 | 0,6 | 26,5 | AE COPD | alive |
| R.K. | w | 73 | 46,7 | 82,6 | 7.431 | 96,6 | 5,1 | 30,4 | AE COPD | alive |
| P.N. | m | 72 | 46,6 | 55,0 | 7.404 | 88,6 | 3,0 | 28,5 | AE COPD | alive |
| M.K. | w | 82 | 46,4 | 53,9 | 7.380 | 87,0 | 1,1 | 26,8 | AE COPD | alive |
| I.J. | w | 75 | 46,4 | 28,7 | 7.364 | 51,3 | 0,2 | 25,9 | AE COPD | alive |
| I.P. | w | 72 | 46,4 | 64,7 | 7.412 | 92,8 | 3,5 | 28,9 | AE COPD | alive |
| C.L. | m | 62 | 46,4 | 103 | 7.323 | 97,2 | -2,7 | 23,5 | AE COPD | alive |
| U.R. | w | 66 | 46,4 | 86,2 | 7.419 | 96,8 | 4,0 | 29,3 | AE COPD | alive |
| K.K. | m | 72 | 46,4 | 66,7 | 7.362 | 92,1 | -0,1 | 25,7 | AE COPD | alive |
| I.G. | m | 61 | 46,3 | 55,2 | 7.397 | 88,4 | 2,3 | 27,8 | AE COPD | alive |
| H.B. | m | 53 | 46,2 | 81,3 | 7.374 | 95,6 | 0,6 | 26,4 | AE COPD | alive |
| I.H. | w | 73 | 46,2 | 69,2 | 7.453 | 94,8 | 6,6 | 31,6 | AE COPD | alive |
| R.A. | m | 69 | 46,2 | 56 | 7.365 | 87,6 | 0 | 25,8 | AE COPD | alive |
| R.L. | w | 53 | 46,1 | 37,3 | 7.375 | 69,5 | 0,7 | 26,4 | AE COPD | alive |
| S.G. | m | 64 | 46,1 | 45,1 | 7.368 | 79,2 | 0,2 | 25,9 | AE COPD | alive |
| E.G. | w | 63 | 46,0 | 59,7 | 7.444 | 92 | 5,8 | 30,8 | AE COPD | alive |
| H.H. | w | 82 | 45,9 | 87,1 | 7.415 | 95,7 | 3,5 | 28,8 | AE COPD | alive |
| W.S. | m | 76 | 45,9 | 80,4 | 7.406 | 95,9 | 2,7 | 28,2 | AE COPD | alive |
| I.W. | w | 60 | 45,7 | 42,3 | 7.445 | 80,9 | 5,7 | 30,7 | AE COPD | alive |
| L.B. | m | 74 | 45,7 | 53,1 | 7.425 | 88,4 | 4,2 | 29,3 | AE COPD | alive |
| B.K. | m | 73 | 45,7 | 66,5 | 7.426 | 93,6 | 4,2 | 29,4 | AE COPD | alive |
| G.B. | w | 71 | 45,7 | 58,8 | 7.440 | 91,5 | 5,3 | 30,3 | AE COPD | alive |
| C.B. | w | 79 | 45,6 | 59,2 | 7.361 | 89,1 | -0,4 | 25,2 | AE COPD | alive |
| H.W. | w | 69 | 45,6 | 65,7 | 7.380 | 92,2 | 0,8 | 26,4 | AE COPD | alive |
| H.W. | w | 79 | 45,6 | 65,7 | 7.380 | 92,2 | 0,8 | 26,4 | AE COPD | alive |
| A.B. | m | 71 | 45,6 | 51 | 7.376 | 84,9 | 0,5 | 26,1 | AE COPD | alive |
| I.S. | w | 70 | 45,5 | 73,5 | 7.400 | 94,7 | 2,3 | 27,6 | AE COPD | alive |
| H.T. | m | 69 | 45,5 | 59,1 | 7.409 | 90,7 | 2,8 | 28,1 | AE COPD | alive |
| P.M. | m | 46 | 45,5 | 32,0 | 7.376 | 59,6 | 0,6 | 26,1 | AE COPD | alive |
| B.L. | w | 43 | 45,5 | 63,4 | 7.388 | 91,7 | 1,3 | 26,8 | AE COPD | alive |
| P.G. | w | 77 | 45,4 | 83,3 | 7.365 | 95,7 | -0,2 | 25,3 | AE COPD | alive |
| H.K. | w | 68 | 45,4 | 56,1 | 7.398 | 88,9 | 2,0 | 27,4 | AE COPD | alive |
| M.S. | w | 78 | 45,4 | 53,8 | 7.411 | 88,2 | 2,9 | 28,2 | AE COPD | alive |
| M.H. | w | 62 | 45,3 | 63,1 | 7.416 | 92,4 | 3,4 | 28,5 | AE COPD | alive |
| M.A. | m | 67 | 45,2 | 60,8 | 7.432 | 92,0 | 4,4 | 29,4 | AE COPD | alive |
| E.H. | m | 78 | 45,2 | 55,4 | 7.372 | 87,5 | 0,1 | 25,6 | AE COPD | alive |
| H.G. | m | 78 | 45,2 | 53,6 | 7.397 | 87,5 | 1,8 | 27,2 | AE COPD | alive |
| A.P. | m | 47 | 45,2 | 54,4 | 7.437 | 89,5 | 4,8 | 29,8 | AE COPD | alive |
| U.S. | w | 67 | 45,2 | 57,9 | 7.406 | 90,1 | 2,5 | 27,8 | AE COPD | alive |
| H.H. | m | 60 | 45,2 | 76,0 | 7.381 | 94,8 | 0,6 | 26,2 | AE COPD | alive |
| A.G. | w | 80 | 78,5 | 59,8 | 7.303 | 88,4 | 9,6 | 38,0 | Cardiac | death in hospital |
| M.S. | w | 93 | 73,3 | 61,4 | 7.358 | 90,9 | 11,4 | 40,3 | Cardiac | death in hospital |
| E.B. | w | 89 | 69,4 | 53,6 | 7.268 | 82,2 | 1,8 | 31 | Cardiac | death in hospital |
| M.K. | w | 90 | 69,0 | 45,5 | 7.213 | 70,2 | -2,0 | 27,2 | Cardiac | death in hospital |
| M.S. | w | 71 | 63,6 | 29,1 | 7.000 | 25,5 | -16,7 | 15,4 | Cardiac | death in hospital |
| J.P. | m | 76 | 50,6 | 34,6 | 7.332 | 61,4 | -0,2 | 26,2 | Cardiac | death in hospital |
| I.A. | m | 65 | 50,0 | 75,9 | 7.270 | 92,3 | -4,7 | 22,4 | Cardiac | death in hospital |
| K.T. | m | 87 | 49,4 | 22,9 | 7.346 | 35,5 | 0,3 | 26,4 | Cardiac | death in hospital |
| E.G. | m | 74 | 47,6 | 17,1 | 7.073 | 11,8 | -16,4 | 13,6 | Cardiac | death in hospital |
| G.G. | m | 79 | 47,2 | 50,6 | 7.405 | 86,1 | 3,7 | 29 | Cardiac | death in hospital |
| H.H. | m | 86 | 46,1 | 88,9 | 7.393 | 96,8 | 1,9 | 27,5 | Cardiac | death in hospital |
| E.S. | m | 61 | 45,7 | 60,9 | 7.419 | 91,7 | 3,8 | 28,9 | Cardiac | death in hospital |
| D.W. | m | 72 | 45,4 | 61,6 | 7.322 | 88,8 | -3,1 | 23,0 | Cardiac | death in hospital |
| G.G. | m | 78 | 64,3 | 51,6 | 7.336 | 84,4 | 6,8 | 33,6 | Cardiac | death 1 year |
| F.M. | w | 84 | 59,3 | 21,1 | 7.363 | 32,6 | 5,6 | 33 | Cardiac | death 1 year |
| K.R. | m | 78 | 49,5 | 26,5 | 7.341 | 44,1 | -0,2 | 26,2 | Cardiac | death 1 year |
| E.G. | w | 96 | 48,4 | 65,2 | 7.377 | 92,1 | 2,2 | 27,8 | Cardiac | death 1 year |
| G.W. | w | 75 | 46,5 | 58,1 | 7.422 | 90,7 | 4,3 | 29,6 | Cardiac | death 1 year |
| I.S. | m | 71 | 46,3 | 43,5 | 7.394 | 79,2 | 2,2 | 27,6 | Cardiac | death 1 year |
| C.E. | m | 70 | 69,7 | 87,9 | 7.246 | 94,7 | 1,0 | 29,6 | Cardiac | alive |
| U.Z. | m | 62 | 67,4 | 18,4 | 7.250 | 20,2 | 0,5 | 28,9 | Cardiac | alive |
| E.R. | w | 84 | 62,6 | 62,6 | 7.379 | 91,7 | 9,1 | 36,1 | Cardiac | alive |
| G.B. | w | 70 | 60,2 | 72,6 | 7.427 | 95,3 | 11,7 | 38,8 | Cardiac | alive |
| H.W. | m | 71 | 58,9 | 48,3 | 7.401 | 84,8 | 9 | 35,7 | Cardiac | alive |
| W.R. | w | 90 | 56,3 | 78,0 | 7.418 | 96,0 | 9,2 | 35,5 | Cardiac | alive |
| L.K. | w | 74 | 55,6 | 64,2 | 7.434 | 93,5 | 10,0 | 36,4 | Cardiac | alive |
| F.H. | w | 78 | 54,8 | 68,3 | 7.335 | 92,1 | 2 | 28,5 | Cardiac | alive |
| J.W. | m | 69 | 54,3 | 16,3 | 7.369 | 21,0 | 3,8 | 30,6 | Cardiac | alive |
| S.K. | w | 85 | 54,2 | 37,3 | 7.337 | 67,0 | 1,7 | 28,4 | Cardiac | alive |
| E.T. | w | 83 | 54,1 | 80,8 | 7.278 | 93,8 | -2,8 | 24,7 | Cardiac | alive |
| W.R. | w | 90 | 53,9 | 67,5 | 7.383 | 93,1 | 5,1 | 31,4 | Cardiac | alive |
| A.A. | w | 85 | 53,9 | 35,8 | 7.422 | 71,4 | 8,0 | 34,3 | Cardiac | alive |
| S.H. | w | 47 | 53,5 | 60,2 | 7.350 | 89,4 | 2,1 | 28,8 | Cardiac | alive |
| G.K. | w | 72 | 53,4 | 22,4 | 7.340 | 34,0 | 1,5 | 28,2 | Cardiac | alive |
| L.L. | w | 24 | 53,1 | 31,4 | 7.384 | 59,8 | 4,6 | 31,0 | Cardiac | alive |
| F.H. | w | 78 | 52,7 | 84,3 | 7.361 | 95,9 | 3,1 | 29,2 | Cardiac | alive |
| F.S. | m | 32 | 52,7 | 35,6 | 7.308 | 61,3 | -1,3 | 25,8 | Cardiac | alive |
| S.H. | w | 46 | 52,5 | 27,1 | 7.400 | 51 | 5,7 | 31,8 | Cardiac | alive |
| M.P. | w | 92 | 52,2 | 69,2 | 7.378 | 93,3 | 3,9 | 30 | Cardiac | alive |
| U.Z. | m | 62 | 51,8 | 26,3 | 7.392 | 48,3 | 4,8 | 30,8 | Cardiac | alive |
| C.U. | w | 73 | 51,8 | 59,1 | 7.417 | 91,2 | 6,6 | 32,6 | Cardiac | alive |
| E.G. | w | 83 | 51,7 | 31,5 | 7.429 | 63,9 | 7,8 | 33,4 | Cardiac | alive |
| B.S. | w | 70 | 51,4 | 31,5 | 7.356 | 57,4 | 1,8 | 28,1 | Cardiac | alive |
| K.K. | w | 89 | 50,9 | 59,5 | 7.278 | 86,0 | -4,1 | 23,3 | Cardiac | alive |
| H.W. | m | 88 | 50,9 | 44,9 | 7.398 | 81,2 | 5,0 | 30,6 | Cardiac | alive |
| E.D. | m | 81 | 50,8 | 54,6 | 7.381 | 87,7 | 3,2 | 29,4 | Cardiac | alive |
| S.H. | w | 22 | 50,6 | 19,5 | 7.338 | 26,5 | 0,0 | 26,6 | Cardiac | alive |
| R.S. | m | 59 | 50,4 | 48,1 | 7.402 | 84,2 | 4,8 | 30,6 | Cardiac | alive |
| U.J. | w | 60 | 50,2 | 45,6 | 7.375 | 80,5 | 3,0 | 28,7 | Cardiac | alive |
| G.T. | m | 75 | 49,7 | 26,5 | 7.332 | 43,2 | -0,7 | 25,7 | Cardiac | alive |
| K.S. | w | 85 | 48,5 | 25,1 | 7.358 | 42 | 0,6 | 26,7 | Cardiac | alive |
| K.R. | m | 71 | 48,2 | 97,3 | 7.322 | 96,8 | -2,2 | 24,4 | Cardiac | alive |
| S.K. | w | 79 | 48,1 | 18,1 | 7.374 | 25,3 | 1,7 | 27,5 | Cardiac | alive |
| A.S. | w | 81 | 48,1 | 16,1 | 7.326 | 18,5 | -1,8 | 24,6 | Cardiac | alive |
| F.S. | w | 91 | 48,1 | 59,5 | 7.366 | 89,5 | 1,1 | 26,9 | Cardiac | alive |
| W.P. | m | 73 | 47,9 | 81,9 | 7.433 | 96,5 | 6,1 | 31,3 | Cardiac | alive |
| F.D. | w | 83 | 47,7 | 45,8 | 7.344 | 78,6 | -0,7 | 25,4 | Cardiac | alive |
| S.Y. | m | 79 | 46,8 | 67,4 | 7.397 | 93,2 | 2,5 | 28,1 | Cardiac | alive |
| G.H. | w | 59 | 46,6 | 29,9 | 7.387 | 56,2 | 1,9 | 27,4 | Cardiac | alive |
| M.P. | w | 70 | 46,4 | 63,3 | 7.393 | 91,8 | 2,1 | 27,7 | Cardiac | alive |
| J.G. | m | 57 | 45,9 | 50,1 | 7.403 | 85,5 | 2,7 | 28,0 | Cardiac | alive |
| S.S. | m | 47 | 45,9 | 69,6 | 7.391 | 93,6 | 1,7 | 27,2 | Cardiac | alive |
| M.K. | w | 78 | 45,9 | 61,8 | 7.406 | 91,7 | 2,8 | 28,2 | Cardiac | alive |
| A.P. | m | 88 | 45,7 | 21,9 | 7.334 | 31,9 | -2,1 | 23,8 | Cardiac | alive |
| H.R. | m | 68 | 45,6 | 59,5 | 7.414 | 91 | 3,3 | 28,5 | Cardiac | alive |
| Z.R. | w | 69 | 45,3 | 72,2 | 7.415 | 94,7 | 3,2 | 28,4 | Cardiac | alive |
| L.W. | m | 69 | 45,1 | 54,3 | 7.373 | 86,9 | 0,1 | 25,7 | Cardiac | alive |
| M.H. | w | 74 | 45,4 | 67,2 | 7.401 | 93,2 | 2,2 | 27,6 | Ob/Hypovent | death 1 year |
| H.K. | w | 68 | 67,1 | 125 | 7.259 | 98,1 | 0,6 | 29,4 | Ob/Hypovent | alive |
| I.S. | w | 74 | 61,3 | 72 | 7.317 | 92 | 3,1 | 30,7 | Ob/Hypovent | alive |
| N.P. | m | 63 | 57,8 | 165 | 7.385 | 99,5 | 7,7 | 33,8 | Ob/Hypovent | alive |
| W.L. | w | 85 | 56,7 | 40,0 | 7.237 | 63,2 | -4,7 | 23,6 | Ob/Hypovent | alive |
| F.K. | m | 62 | 56,5 | 57,1 | 7.440 | 91,3 | 11 | 37,5 | Ob/Hypovent | alive |
| G.B. | m | 71 | 55,3 | 59,0 | 7.376 | 89,9 | 4,8 | 31,6 | Ob/Hypovent | alive |
| G.P. | m | 60 | 52,6 | 44,7 | 7.383 | 80,2 | 4,2 | 30,7 | Ob/Hypovent | alive |
| C.U. | w | 74 | 52,3 | 61,4 | 7.400 | 91,6 | 5,4 | 31,7 | Ob/Hypovent | alive |
| A.H. | w | 40 | 51,9 | 61,5 | 7.347 | 89,8 | 1,1 | 27,8 | Ob/Hypovent | alive |
| M.K. | w | 57 | 51,2 | 44,9 | 7.400 | 81,2 | 4,6 | 31,0 | Ob/Hypovent | alive |
| M.B. | m | 63 | 51,1 | 25,1 | 7.358 | 42,3 | 2,0 | 28,1 | Ob/Hypovent | alive |
| L.S. | w | 77 | 51,0 | 70,0 | 7.439 | 94,8 | 8,0 | 33,7 | Ob/Hypovent | alive |
| H.L. | m | 74 | 50,8 | 65,6 | 7.401 | 92,9 | 4,8 | 30,9 | Ob/Hypovent | alive |
| M.K. | w | 82 | 50,5 | 56,1 | 7.377 | 88,3 | 2,8 | 29,0 | Ob/Hypovent | alive |
| N.A. | m | 52 | 50,2 | 51,7 | 7.400 | 86,7 | 4,4 | 30,4 | Ob/Hypovent | alive |
| R.C. | m | 62 | 50,1 | 58,5 | 7.399 | 90,3 | 4,5 | 30,2 | Ob/Hypovent | alive |
| E.K. | w | 60 | 49,8 | 43,8 | 7.385 | 79,1 | 3,1 | 29,1 | Ob/Hypovent | alive |
| M.H. | m | 41 | 49,6 | 52,2 | 7.404 | 87,2 | 4,4 | 30,3 | Ob/Hypovent | alive |
| A.M. | w | 50 | 49,5 | 67,8 | 7.432 | 94,2 | 6,7 | 32,3 | Ob/Hypovent | alive |
| G.K. | m | 65 | 49,2 | 60,7 | 7.387 | 90,8 | 3,0 | 28,9 | Ob/Hypovent | alive |
| G.S. | m | 70 | 49,2 | 86,8 | 7.371 | 96,3 | 1,7 | 27,8 | Ob/Hypovent | alive |
| G.S. | m | 64 | 49,1 | 62,1 | 7.418 | 92,2 | 5,3 | 31,0 | Ob/Hypovent | alive |
| H.E. | m | 78 | 49,1 | 52,1 | 7.447 | 88,8 | 7,7 | 33,2 | Ob/Hypovent | alive |
| W.J. | m | 77 | 48,7 | 62,0 | 7.422 | 92,3 | 5,4 | 31,0 | Ob/Hypovent | alive |
| G.S. | m | 64 | 48,6 | 63,0 | 7.417 | 92,5 | 5,0 | 30,7 | Ob/Hypovent | alive |
| G.O. | m | 63 | 48,2 | 63,3 | 7.432 | 92,9 | 6,0 | 31,4 | Ob/Hypovent | alive |
| W.R. | m | 52 | 48,0 | 62,8 | 7.425 | 92,6 | 5,3 | 30,8 | Ob/Hypovent | alive |
| M.R. | w | 63 | 47,9 | 67,9 | 7.479 | 95,1 | 9,7 | 34,8 | Ob/Hypovent | alive |
| A.H. | m | 53 | 47,9 | 58,1 | 7.390 | 89,7 | 2,6 | 28,4 | Ob/Hypovent | alive |
| W.O. | m | 60 | 47,7 | 55,7 | 7.422 | 89,7 | 4,9 | 30,4 | Ob/Hypovent | alive |
| F.K. | m | 61 | 47,7 | 91,4 | 7.352 | 96,6 | -0,3 | 25,9 | Ob/Hypovent | alive |
| E.S. | w | 29 | 47,6 | 56,9 | 7.409 | 89,8 | 3,9 | 29,4 | Ob/Hypovent | alive |
| W.B. | m | 61 | 47,4 | 36,4 | 7.375 | 68,1 | 1,4 | 27,1 | Ob/Hypovent | alive |
| J.J. | m | 53 | 47,1 | 58,1 | 7.380 | 89,6 | 1,5 | 27,2 | Ob/Hypovent | alive |
| M.H. | m | 40 | 47,1 | 63,3 | 7.410 | 92,3 | 3,7 | 29,2 | Ob/Hypovent | alive |
| A.S. | w | 56 | 47,1 | 75,7 | 7.383 | 94,8 | 1,7 | 27,4 | Ob/Hypovent | alive |
| K.S. | m | 74 | 47,1 | 75,5 | 7.315 | 93,3 | -3,0 | 23,5 | Ob/Hypovent | alive |
| D.H. | m | 25 | 47,0 | 56,4 | 7.432 | 90,4 | 5,4 | 30,7 | Ob/Hypovent | alive |
| G.K. | m | 64 | 46,8 | 57,9 | 7.373 | 88,9 | 0,8 | 26,6 | Ob/Hypovent | alive |
| I.G. | m | 60 | 46,7 | 63,9 | 7.373 | 91,5 | 0,8 | 26,6 | Ob/Hypovent | alive |
| M.S. | m | 48 | 46,7 | 53,2 | 7.361 | 85,7 | -0,1 | 25,8 | Ob/Hypovent | alive |
| H.Z. | m | 75 | 46,6 | 71,6 | 7.407 | 94,4 | 3,2 | 28,7 | Ob/Hypovent | alive |
| E.K. | w | 59 | 46,5 | 52,8 | 7.384 | 86,5 | 1,5 | 27,1 | Ob/Hypovent | alive |
| I.W. | w | 64 | 46,5 | 60,8 | 7.397 | 91,0 | 2,4 | 27,9 | Ob/Hypovent | alive |
| W.O. | m | 60 | 46,4 | 48,9 | 7.387 | 83,8 | 1,6 | 27,2 | Ob/Hypovent | alive |
| W.K. | m | 45 | 46,3 | 62,2 | 7.310 | 88,6 | -3,7 | 22,8 | Ob/Hypovent | alive |
| S.C. | m | 43 | 46,3 | 89,0 | 7.397 | 96,8 | 2,4 | 27,9 | Ob/Hypovent | alive |
| N.D. | w | 69 | 46,0 | 35,0 | 7.406 | 68,2 | 3,2 | 28,3 | Ob/Hypovent | alive |
| M.M. | w | 69 | 45,8 | 67,9 | 7.382 | 92,9 | 1,0 | 26,6 | Ob/Hypovent | alive |
| R.S. | m | 49 | 45,8 | 83,5 | 7.393 | 96,1 | 1,8 | 27,3 | Ob/Hypovent | alive |
| K.B. | w | 71 | 45,8 | 67 | 7.395 | 93 | 2 | 27,4 | Ob/Hypovent | alive |
| F.K. | m | 84 | 45,6 | 57,2 | 7.387 | 89,1 | 1,3 | 26,8 | Ob/Hypovent | alive |
| R.T. | m | 48 | 45,6 | 69,2 | 7.385 | 93,4 | 1,1 | 26,7 | Ob/Hypovent | alive |
| J.P. | m | 68 | 45,6 | 70,5 | 7.367 | 93,3 | -0,1 | 25,6 | Ob/Hypovent | alive |
| G.S. | m | 63 | 45,5 | 63,2 | 7.408 | 92,2 | 2,7 | 28,0 | Ob/Hypovent | alive |
| H.S. | w | 75 | 45,5 | 71,1 | 7.386 | 93,8 | 1,2 | 26,7 | Ob/Hypovent | alive |
| I.W. | w | 64 | 45,5 | 67,3 | 7.406 | 93,4 | 2,6 | 27,9 | Ob/Hypovent | alive |
| H.W. | w | 64 | 45,4 | 65,1 | 7.361 | 91,5 | -0,6 | 25,1 | Ob/Hypovent | alive |
| W.K. | m | 56 | 45,4 | 85,1 | 7.370 | 96,0 | 0,0 | 25,7 | Ob/Hypovent | alive |
| H.P. | m | 50 | 45,3 | 70,4 | 7.393 | 93,8 | 1,6 | 27,0 | Ob/Hypovent | alive |
| M.S. | m | 43 | 45,2 | 65,5 | 7.382 | 92,2 | 0,8 | 26,3 | Ob/Hypovent | alive |
| E.H. | w | 73 | 45,1 | 57,0 | 7.389 | 89,0 | 1,2 | 26,6 | Ob/Hypovent | alive |
| H.B. | m | 80 | 70,6 | 198,5 | 7.226 | 99,4 | -0,8 | 28,6 | miscellaneneous | death in hospital |
| A.T. | w | 56 | 69,0 | 30,1 | 7.380 | 58,0 | 11,2 | 39,9 | miscellaneneous | death in hospital |
| B.K. | m | 79 | 51,3 | 54,8 | 7.466 | 91,0 | 11,0 | 36,1 | miscellaneneous | death in hospital |
| M.S. | m | 79 | 45,3 | 56,3 | 7.362 | 87,6 | -0,6 | 25,1 | miscellaneneous | death in hospital |
| I.W. | w | 79 | 50,3 | 17,8 | 7.482 | 31,7 | 12,2 | 36,8 | miscellaneneous | death 1 year |
| H.S. | w | 63 | 74,8 | 140 | 7.369 | 99,1 | 13,8 | 42,2 | neuromuscular | death 1 year |
| D.S. | m | 56 | 58,2 | 63,5 | 7.391 | 92,2 | 7,5 | 34,5 | neuromuscular | death 1 year |
| D.S. | m | 56 | 57,2 | 68,8 | 7.401 | 93,9 | 7,9 | 34,7 | neuromuscular | death 1 year |
| E.W. | w | 63 | 56,1 | 38,2 | 7.358 | 70,5 | 4,6 | 30,8 | miscellaneneous | death 1 year |
| H.T. | w | 82 | 54,4 | 40,6 | 7.309 | 69,9 | -0,6 | 26,7 | miscellaneneous | death 1 year |
| K.S. | m | 87 | 54,1 | 24,4 | 7.371 | 41,9 | 4,4 | 30,7 | miscellaneneous | death 1 year |
| C.K. | w | 81 | 53,9 | 52,2 | 7.358 | 85,3 | 2,9 | 29,6 | miscellaneneous | death 1 year |
| H.M. | m | 74 | 50,4 | 50,7 | 7.401 | 86,1 | 4,6 | 30,6 | miscellaneneous | death 1 year |
| H.A. | m | 80 | 50,3 | 25,5 | 7.357 | 43,1 | 1,6 | 27,5 | miscellaneneous | death 1 year |
| M.H. | w | 64 | 50,0 | 93,4 | 7.395 | 97,3 | 3,9 | 29,9 | miscellaneneous | death 1 year |
| E.R. | m | 67 | 46,1 | 63,0 | 7.466 | 93,6 | 7,7 | 32,5 | miscellaneneous | death 1 year |
| J.R. | m | 75 | 46,1 | 60,9 | 7.429 | 92,0 | 4,7 | 29,8 | neuromuscular | death 1 year |
| A.G. | w | 80 | 45,4 | 23,8 | 7.356 | 38,3 | -0,7 | 24,9 | miscellaneneous | death 1 year |
| M.S. | w | 68 | 56,3 | 28,8 | 7.301 | 46,6 | -0,3 | 27,1 | miscellaneneous | alive |
| B.K. | w | 66 | 69,1 | 177 | 7.094 | 98,7 | -10,1 | 20,7 | miscellaneneous | alive |
| L.F. | w | 84 | 59,3 | 19,4 | 7.287 | 23,8 | 0,5 | 27,7 | miscellaneneous | alive |
| P.T. | m | 61 | 58,1 | 54,8 | 7.358 | 87,1 | 4,7 | 32 | neuromuscular | alive |
| M.G. | w | 62 | 57,1 | 18,6 | 7.331 | 24,5 | 2,6 | 29,5 | miscellaneneous | alive |
| M.S. | m | 21 | 54,1 | 54,5 | 7.385 | 87,9 | 5,0 | 31,6 | neuromuscular | alive |
| H.S. | w | 64 | 53,6 | 78,7 | 7.414 | 95,9 | 7,2 | 33,5 | neuromuscular | alive |
| W.P. | m | 73 | 52,8 | 61,5 | 7.421 | 92,2 | 7,4 | 33,5 | miscellaneneous | alive |
| K.W. | m | 76 | 52,5 | 106 | 7.274 | 97 | -3,6 | 23,8 | miscellaneneous | alive |
| H.K. | m | 61 | 51,9 | 90,6 | 7.403 | 97,1 | 5,4 | 31,7 | miscellaneneous | alive |
| T.H. | m | 51 | 51,5 | 15,3 | 7.342 | 17,6 | 0,7 | 27,3 | miscellaneneous | alive |
| H.K. | m | 61 | 51,4 | 88,3 | 7.385 | 96,7 | 3,8 | 30,1 | miscellaneneous | alive |
| R.E. | w | 54 | 51,4 | 29,6 | 7.357 | 53,1 | 1,8 | 28,2 | miscellaneneous | alive |
| E.W. | w | 64 | 51,3 | 70,5 | 7.382 | 93,8 | 3,7 | 29,8 | miscellaneneous | alive |
| H.M. | m | 75 | 51,1 | 43,1 | 7.408 | 80,0 | 5,6 | 31,5 | neuromuscular | alive |
| B.K. | w | 66 | 51,1 | 49,1 | 7.415 | 85,7 | 6,4 | 32,1 | miscellaneneous | alive |
| W.F. | m | 71 | 50,8 | 119 | 7.427 | 98,8 | 7,4 | 32,8 | miscellaneneous | alive |
| G.W. | w | 76 | 50,1 | 77,8 | 7.378 | 95,2 | 3,3 | 28,8 | miscellaneneous | alive |
| A.B. | m | 30 | 49,7 | na | 7.356 | na | 0,9 | 27,2 | miscellaneneous | alive |
| U.H. | m | 68 | 49,6 | 49,2 | 7.416 | 85,7 | 5,4 | 31,2 | miscellaneneous | alive |
| H.E. | w | 58 | 49,5 | 121 | 7.455 | 99,0 | 9,0 | 34,0 | neuromuscular | alive |
| N.F. | m | 59 | 49,5 | 50,4 | 7.377 | 84,6 | 2,3 | 28,4 | neuromuscular | alive |
| U.W. | w | 78 | 48,9 | 31,9 | 7.377 | 59,9 | 2,1 | 28,1 | miscellaneneous | alive |
| W.C. | m | 71 | 48,9 | 31,7 | 7.426 | 63,9 | 6,2 | 31,4 | miscellaneneous | alive |
| J.R. | m | 71 | 48,8 | 79,2 | 7.404 | 95,8 | 4,1 | 29,9 | neuromuscular | alive |
| U.T. | w | 67 | 48,7 | 68,2 | 7.380 | 93,0 | 2,1 | 28,1 | neuromuscular | alive |
| H.S. | w | 64 | 48,6 | 90,4 | 7.437 | 97,4 | 6,6 | 32,0 | neuromuscular | alive |
| H.B. | w | 85 | 48,6 | 26,9 | 7.358 | 46,6 | 0,8 | 26,7 | miscellaneneous | alive |
| H.S. | w | 64 | 47,7 | 88,5 | 7.441 | 97,3 | 6,4 | 31,7 | neuromuscular | alive |
| S.M. | w | 47 | 47,7 | 32,9 | 7.370 | 61,1 | 1,5 | 26,9 | miscellaneneous | alive |
| I.S. | w | 69 | 47,4 | 38,1 | 7.376 | 71,0 | 1,3 | 27,1 | miscellaneneous | alive |
| M.K. | w | 84 | 47,4 | 64,0 | 7.422 | 92,8 | 4,8 | 30,2 | miscellaneneous | alive |
| B.S. | w | 47 | 47,3 | 41,5 | 7.346 | 73,5 | -0,8 | 25,3 | miscellaneneous | alive |
| F.N. | m | 21 | 47,2 | 60,0 | 7.327 | 88,2 | -2,2 | 24,2 | neuromuscular | alive |
| A.T. | w | 76 | 47,0 | 28,5 | 7.432 | 57 | 5,7 | 30,6 | miscellaneneous | alive |
| H.R. | w | 92 | 46,9 | 79,8 | 7.393 | 95,6 | 2,3 | 28,0 | neuromuscular | alive |
| H.G. | m | 54 | 46,9 | 65,4 | 7.428 | 93,4 | 5,0 | 30,3 | neuromuscular | alive |
| S.S. | m | 27 | 46,8 | 109 | 7.382 | 98,1 | 1,5 | 27,2 | neuromuscular | alive |
| L.U. | w | 58 | 46,7 | 69,0 | 7.367 | 92,9 | 0,4 | 26,2 | neuromuscular | alive |
| J.R. | m | 63 | 46,7 | 72,0 | 7.416 | 94,7 | 3,9 | 29,3 | neuromuscular | alive |
| H.M. | w | 87 | 46,7 | 25,4 | 7.375 | 43,9 | 1,1 | 26,7 | miscellaneneous | alive |
| A.S. | m | 55 | 46,6 | 68,0 | 7.369 | 92,7 | 0,4 | 26,2 | neuromuscular | alive |
| R.S. | w | 49 | 46,6 | 22,3 | 7.386 | 36,9 | 1,7 | 27,3 | miscellaneneous | alive |
| D.K. | m | 22 | 46,4 | 71,6 | 7.384 | 93,9 | 1,3 | 27,1 | neuromuscular | alive |
| Y.U. | m | 71 | 46,2 | 59,4 | 7.414 | 91,0 | 3,5 | 28,8 | miscellaneneous | alive |
| R.R. | m | 49 | 46,2 | 64,4 | 7.373 | 91,6 | 0,6 | 26,3 | miscellaneneous | alive |
| G.S. | m | 57 | 46,0 | 77,0 | 7.393 | 95,2 | 1,9 | 27,4 | neuromuscular | alive |
| T.G. | w | 70 | 46,0 | 72,1 | 7.440 | 95,1 | 5,5 | 30,5 | miscellaneneous | alive |
| E.M. | w | 72 | 45,8 | 64,4 | 7.385 | 91,9 | 1,2 | 26,8 | miscellaneneous | alive |
| E.R. | w | 43 | 45,6 | 29,4 | 7.351 | 51,5 | -1,2 | 24,6 | miscellaneneous | alive |
| W.K. | m | 70 | 45,3 | 76,1 | 7.382 | 94,8 | 0,8 | 26,3 | miscellaneneous | alive |
| L.U. | w | 57 | 45,3 | 74,8 | 7.366 | 94,3 | -0,3 | 25,4 | neuromuscular | alive |
| R.W. | w | 69 | 45,3 | 55,7 | 7.431 | 90,0 | 4,4 | 29,5 | neuromuscular | alive |
| I.S. | w | 73 | 45,3 | 58,1 | 7.397 | 89,8 | 1,8 | 27,2 | neuromuscular | alive |
| I.T. | w | 81 | 45,3 | 18,1 | 7.416 | 27,7 | 3,5 | 28,5 | miscellaneneous | alive |
| A.Z. | m | 31 | 45,3 | 77 | 7.418 | 95,6 | 3,4 | 28,6 | miscellaneneous | alive |
| J.B. | m | 41 | 45,2 | 91,8 | 7.411 | 97,2 | 2,8 | 28,1 | miscellaneneous | alive |
| M.A. | m | 65 | 45,2 | 55,7 | 7.368 | 87,5 | -0,2 | 25,4 | miscellaneneous | alive |
| C.Q. | w | 70 | 45,1 | 23,5 | 7.394 | 40,5 | 1,9 | 26,9 | miscellaneneous | alive |
| I.F. | w | 71 | 45,1 | 17,1 | 7.278 | 18,3 | -5,8 | 20,7 | miscellaneneous | alive |
| S.S. | m | 20 | 45,1 | 41,9 | 7.380 | 76,4 | 0,5 | 26,1 | miscellaneneous | alive |
| W.L. | w | 84 | 71,2 | 124,2 | 7.172 | 97,4 | -4,7 | 25,5 | Intox. (Opiat) | alive |
| E.N. | w | 84 | 62,5 | 76,2 | 7.238 | 91,9 | -1,9 | 26,1 | Intox. (Opiat) | alive |
| W.K. | m | 78 | 55,4 | 264,0 | 7.300 | 99,8 | -0,7 | 26,6 | Intox. (Opiat) | alive |
| W.L. | w | 79 | 55,1 | 65,8 | 7.399 | 93,0 | 6,9 | 33,3 | Intox. (Opiat) | alive |
| H.R. | w | 71 | 54,7 | 53,0 | 7.284 | 82,0 | -2,0 | 25,4 | Intox. (Opiat) | alive |
| M.W. | m | 18 | 53,2 | 51,4 | 7.309 | 82,1 | -1,1 | 26,1 | Intox. (Opiat) | alive |
| R.B. | m | 85 | 52,2 | 32,4 | 7.330 | 57,1 | 0,6 | 26,9 | Intox. (Opiat) | alive |
| M.S. | w | 29 | 52,0 | 89,7 | 7.407 | 97,1 | 5,9 | 32,0 | Intox. (Opiat) | alive |
| C.G. | m | 49 | 51,4 | 39,2 | 7.324 | 69,0 | -0,5 | 26,2 | Intox. (Opiat) | alive |
| L.K. | m | 27 | 50,5 | 89,5 | 7.348 | 96,3 | 0,8 | 27,1 | Intox. (Opiat) | alive |
| H.N. | m | 77 | 48,2 | 122 | 7.363 | 98,5 | 0,8 | 26,8 | Intox. (Opiat) | alive |
| R.M. | w | 72 | 48,1 | 31,3 | 7.361 | 57 | 0,5 | 26,6 | Intox. (Opiat) | alive |
| B.K. | w | 58 | 47,5 | 60,6 | 7.418 | 91,6 | 4,5 | 29,9 | Intox. (Opiat) | alive |
| H.P. | m | 80 | 47,1 | 39,5 | 7.403 | 75 | 3,4 | 28,7 | Intox. (Opiat) | alive |
| G.S. | m | 20 | 46,6 | 61,8 | 7.367 | 90,5 | 0,2 | 26,1 | Intox. (Opiat) | alive |
| M.P. | m | 18 | 46,4 | 43,1 | 7.425 | 80,7 | 4,7 | 29,8 | Intox. (Opiat) | alive |
| M.P. | m | 23 | 45,7 | 30,3 | 7.345 | 53,2 | -1,4 | 24,4 | Intox. (Opiat) | alive |
| J.B. | w | 18 | 45,5 | 20,6 | 7.304 | 26,7 | -4,3 | 22,1 | Intox. (Opiat) | alive |
| M.U. | m | 49 | 45,4 | 66,2 | 7.372 | 92,1 | 0,1 | 25,7 | Intox. (Opiat) | alive |
| M.S. | m | 44 | 45,1 | 62,2 | 7.402 | 91,6 | 2,1 | 27,4 | Intox. (Opiat) | alive |
| R.S. | m | 56 | 45,1 | 38,5 | 7.443 | 76,3 | 5,4 | 30,2 | Intox. (Opiat) | alive |
| V.T. | w | 91 | 61,0 | 41,9 | 7.299 | 71,5 | 1,6 | 29,3 | Cardiac | lost to follow up |
| E.R. | m | 86 | 50,9 | 45,5 | 7.316 | 76,6 | -0,9 | 25,4 | AE COPD | lost to follow up |
| A.D. | m | 83 | 50,2 | 26,8 | 7.352 | 45,7 | 0,7 | 27,2 | Pneumonia | lost to follow up |
| G.D. | m | 66 | 49,9 | 82,3 | 7.380 | 95,9 | 3,1 | 28,8 | AE COPD | lost to follow up |
| H.B. | m | 65 | 46,9 | 81,1 | 7.337 | 94,9 | -1,6 | 24,6 | AE COPD | lost to follow up |
